# Supplementary material for: Rapid nucleation and optimal surface–ligand interaction stabilize wurtzite MnSe
Source: Royal Society of Chemistry journal article supplement (doi:10.1039/d4cp02294g), 2024-01-01
Supplement: d4cp02294g1.pdf [file d4cp02294g1.pdf]

## Supporting information

# Rapid nucleation and optimal surface-ligand interaction stabilize Wurtzite MnSe

*Rashmi<sup>†</sup>, Shilendra Kumar Sharma<sup>†</sup>, Vivek Chaudhary<sup>#</sup>, Raj Ganesh S. Pala<sup>†, #, \*</sup>, Sri Sivakumar<sup>‡</sup>*

*<sup>#, †, ‡, \*</sup>*

<sup>†</sup> Materials Science Programme, Indian Institute of Technology, Kanpur, Uttar Pradesh, 208016, India

<sup>#</sup> Department of Chemical Engineering, Indian Institute of Technology, Kanpur, Uttar Pradesh, 208016, India

<sup>⊥</sup> Centre for Environmental Science and Engineering, Indian Institute of Technology, Kanpur, Uttar Pradesh, 208016, India

<sup>‡</sup> Thematic Unit of Excellence on Soft Nanofabrication, Indian Institute of Technology, Kanpur, Uttar Pradesh, 208016, India

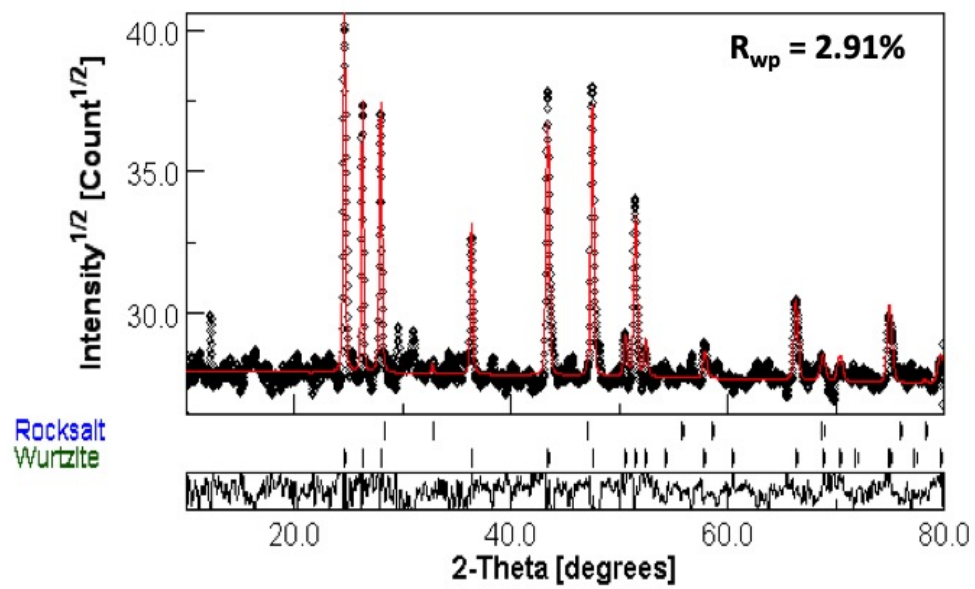

**Figure S1.** XRD Rietveld Refinement of MnSe Wurtzite Spectra along with the Rocksalt.

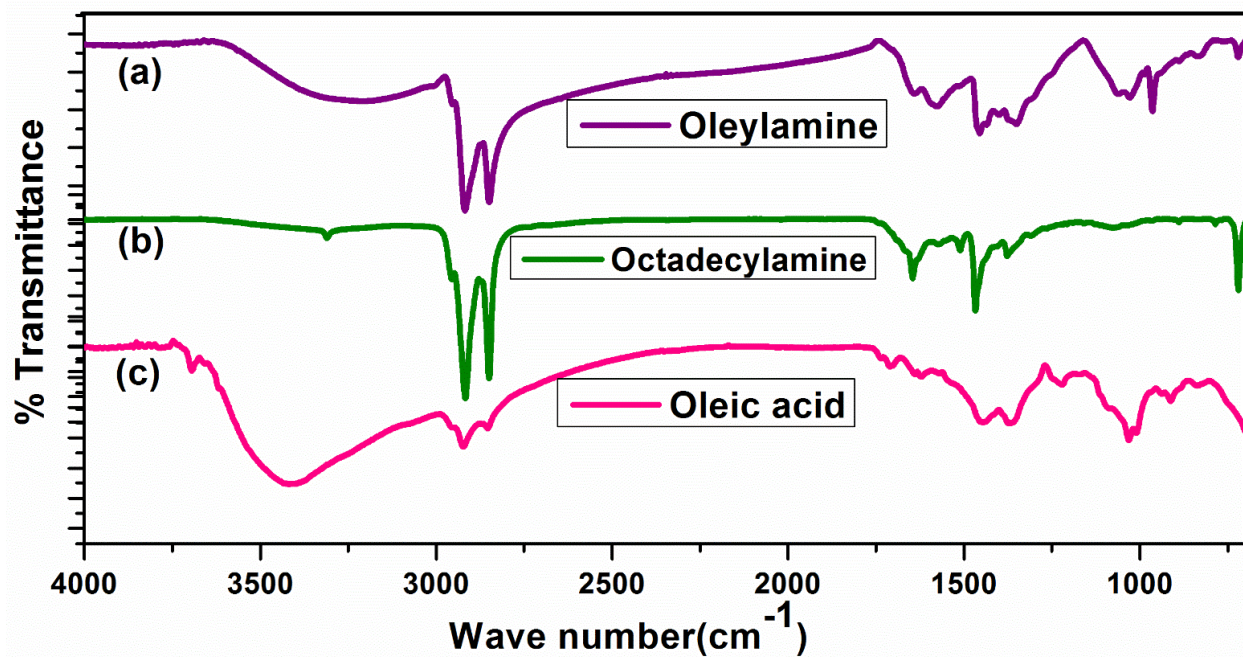

**Figure S2.** FTIR spectra of (a) Rocksalt phase synthesized with oleylamine, (b) Rocksalt phase synthesized with octadecylamine and c) Wurtzite phase synthesized with oleic acid.

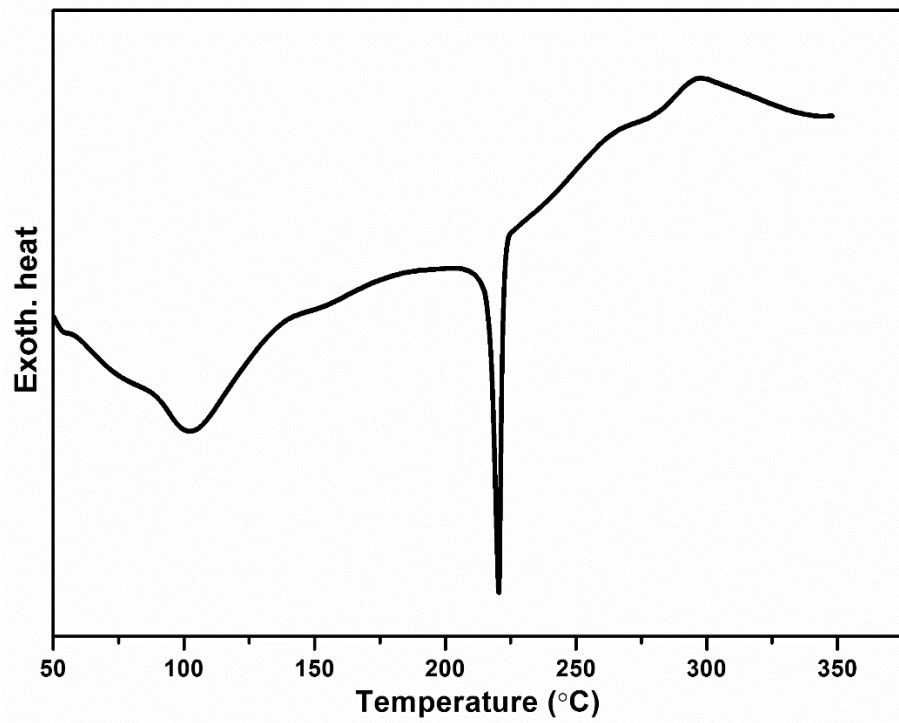

**Figure S3.** DSC curve of the Wurtzite/NNS.

(a)

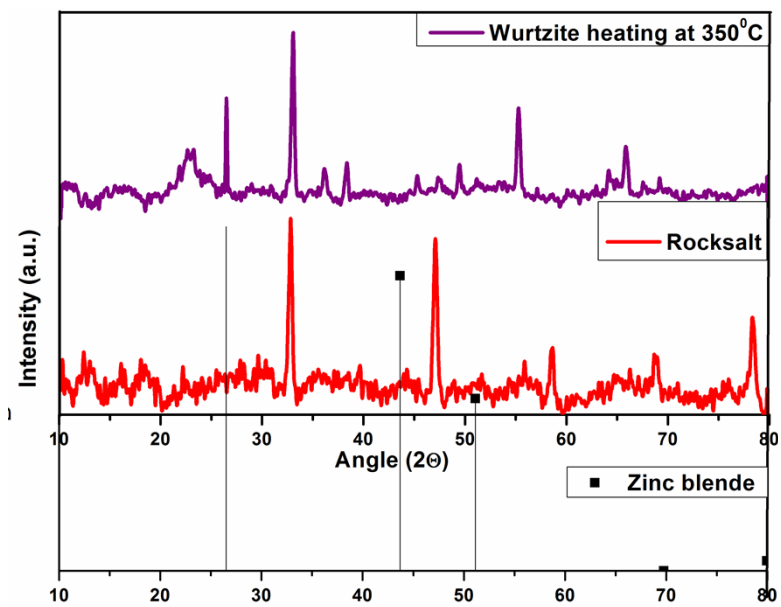

(b)

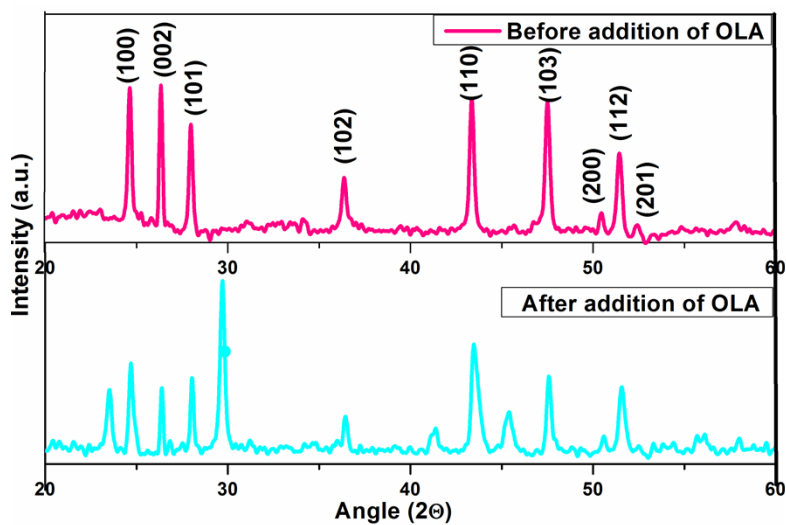

**Figure S4.** a) XRD pattern (from top to bottom) of Wurtzite along with the rock salt (when Wurtzite heated at 350 °C) and standard Zinc blende polymorph of MnSe, b) (from top to bottom) XRD of Wurtzite polymorph before and after addition of oleylamine (no phase change observed after ligand exchange reaction).

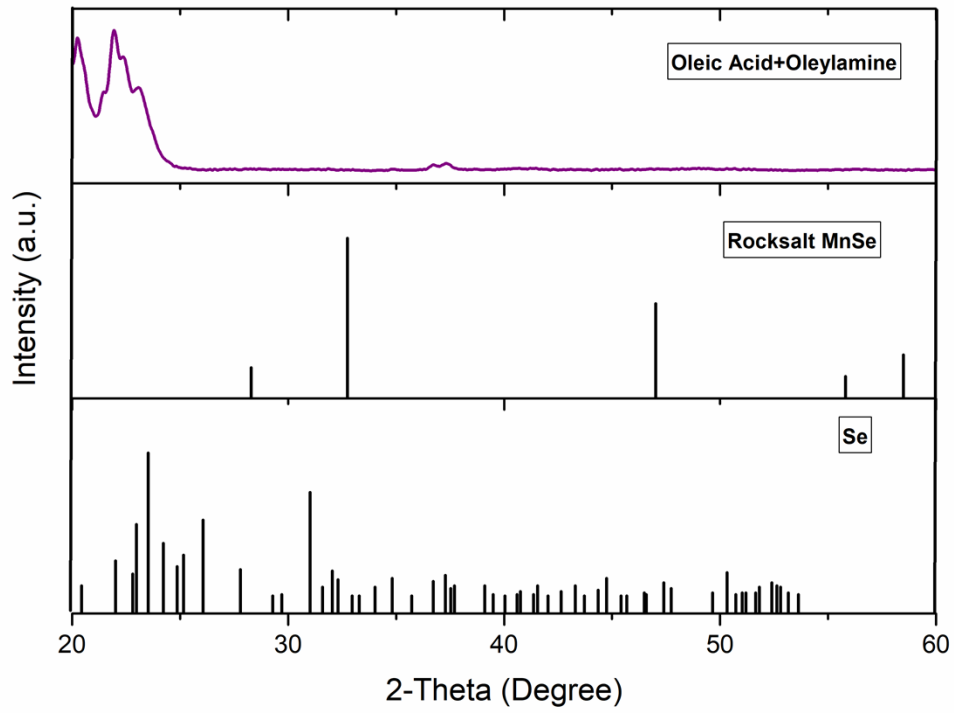

**Figure S5.** XRD pattern of sample synthesized with the oleic acid and oleylamine along with the Rocksalt.

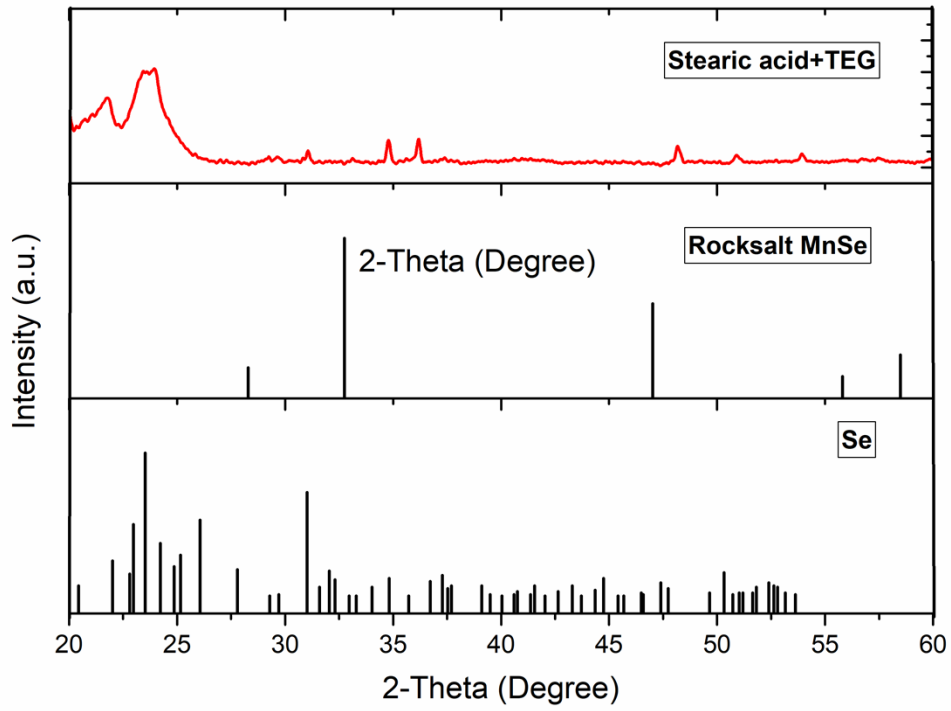

**Figure S6.** XRD pattern of sample synthesized with the stearic acid and octadecene along with the Rocksalt.

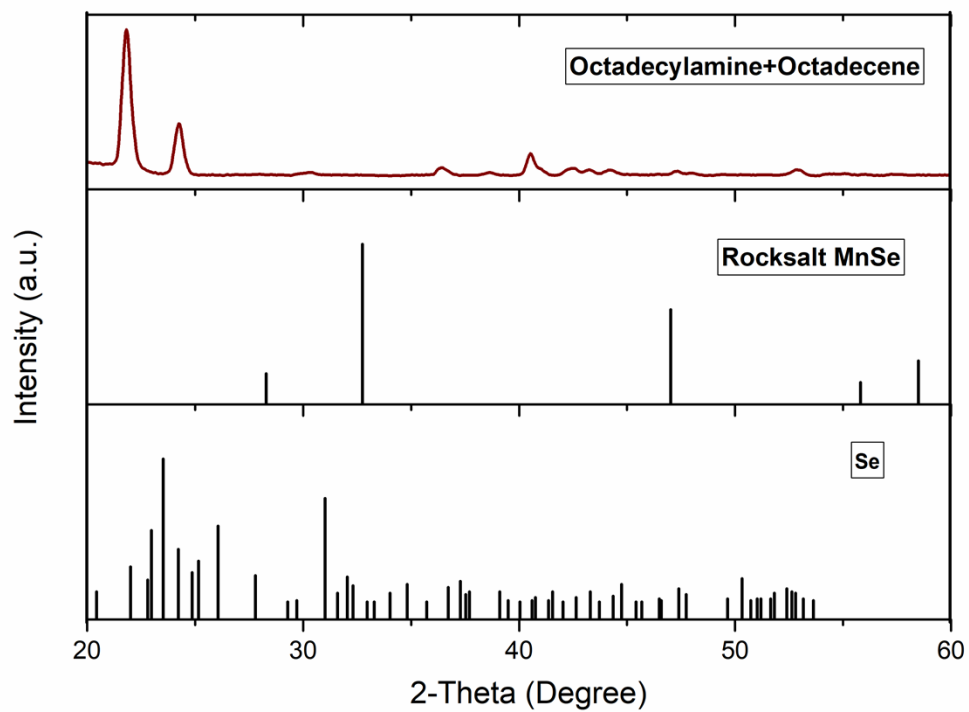

**Figure S7.** XRD pattern of sample synthesized with the combination of octadecylamine and octadecene along with the Rocksalt.



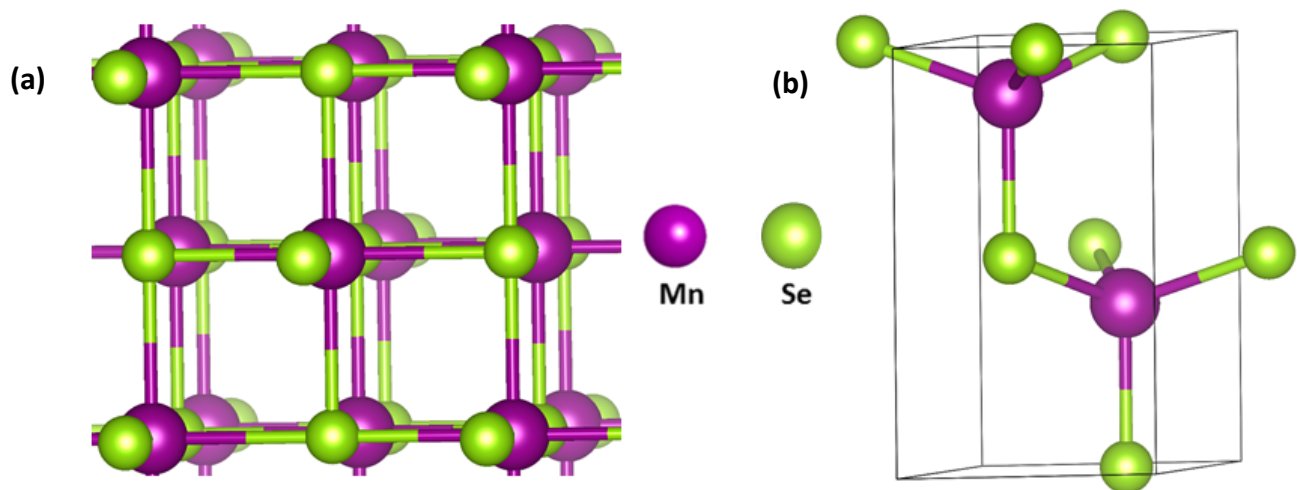

**Figure S8.** Crystal structure of a) Rocksalt/NS, b) Wurtzite/NNS of MnSe.

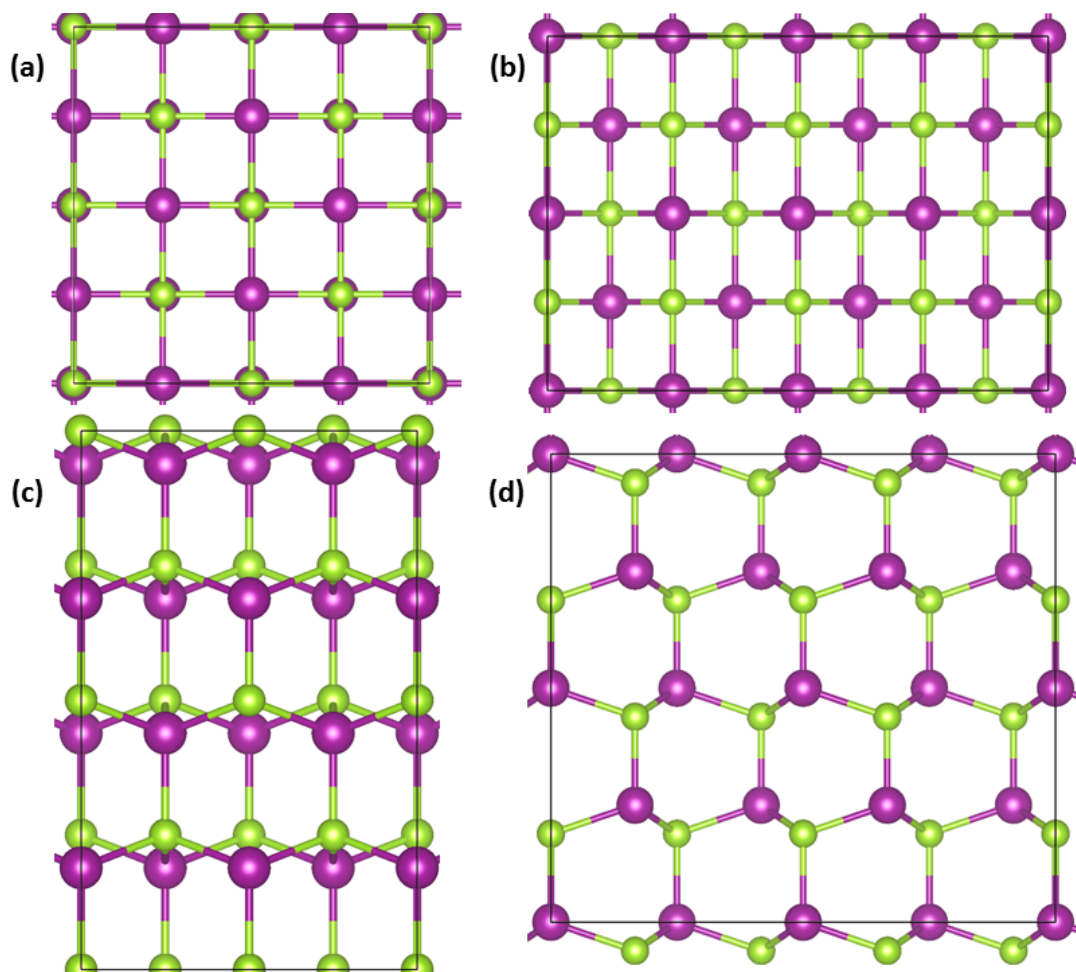

**Figure S9.** Top view of the crystal structures of (a) Rocksalt (100), (b) Rocksalt (110), (c) Wurtzite ( $10\bar{1}0$ ) and (d) Wurtzite ( $11\bar{2}0$ ) surfaces.

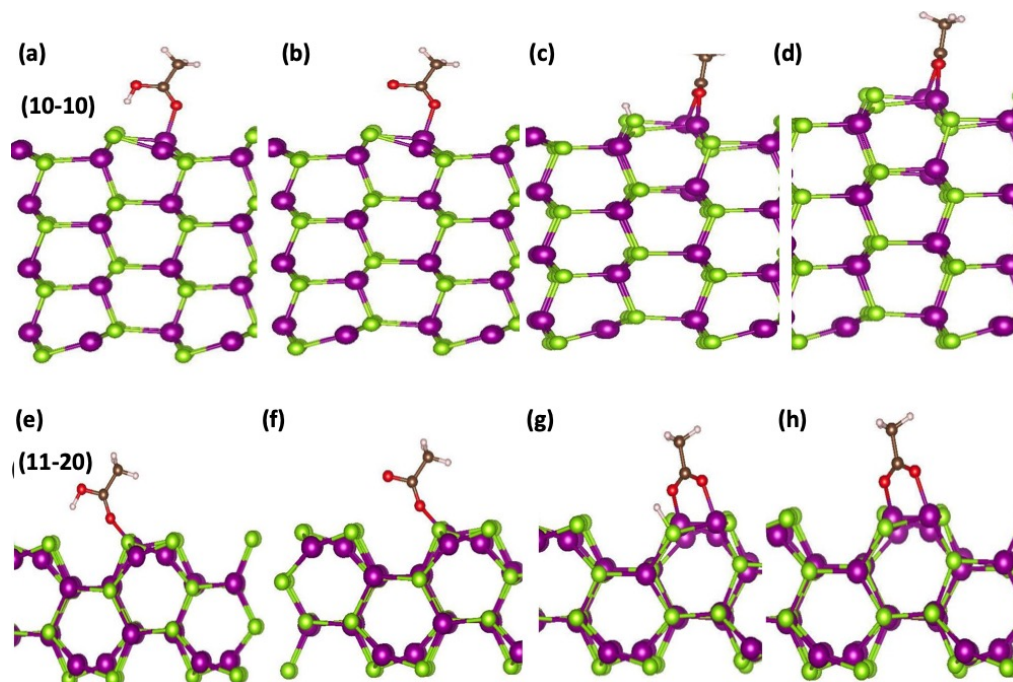

**Figure S10.** From left to right: a & e) Acetic acid (monodentate), (b & f) Acetate ion (monodentate), c & g) Acetic acid (bidentate), and d & h) Acetate ion (bidentate), adsorption on  $(10\bar{1}0)$  and  $(11\bar{2}0)$  surface of Wurtzite/NNS polymorph of MnSe.

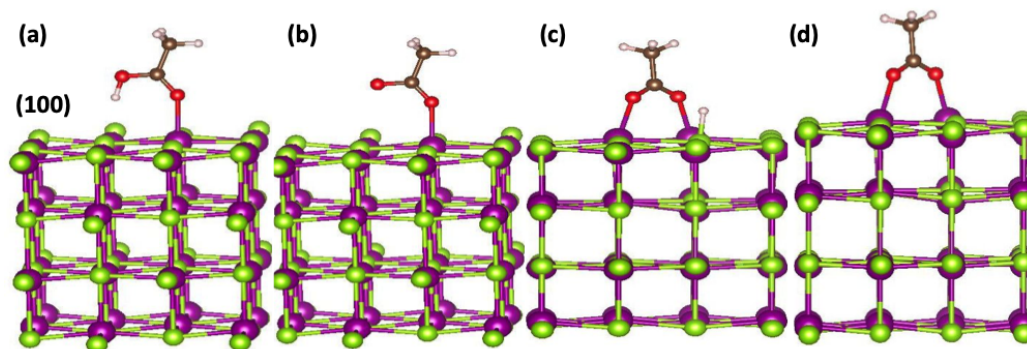

**Figure S11.** From left to right: a) Acetic acid (monodentate), (b) Acetate ion (monodentate), (c) Acetic acid (bidentate), and (d) Acetate ion (bidentate), adsorption on  $(100)$  surface of Rocksalt/NS polymorph of MnSe.

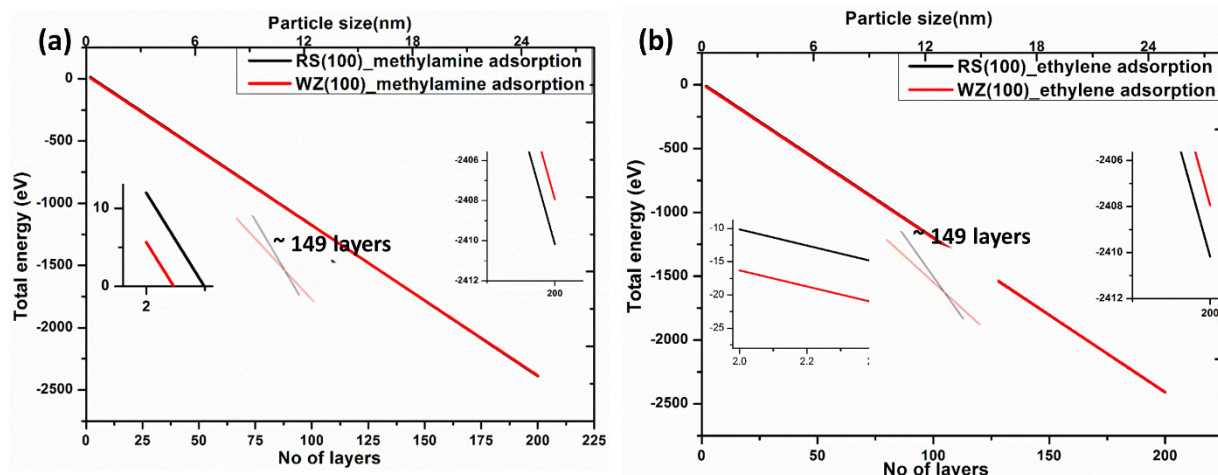

**Figure S12.** Total energy versus number of layers (particle size) plot of (a) methylamine (b) ethylene adsorption on (100) and (10 $\bar{1}$ 0) surfaces of Rocksalt/NS and Wurtzite/NNS polymorphs of MnSe.

**Table S1.** Surface energy of both the surfaces of Rocksalt and Wurtzite polymorphs of MnSe.

| S.No. | Different surfaces of MnSe polymorphs | Surface energy (j/m <sup>2</sup> ) |
|-------|---------------------------------------|------------------------------------|
| 1.    | Rocksalt/NS (100 surface)             | 0.24 j /m <sup>2</sup>             |
| 2.    | Wurtzite/NNS (10 $\bar{1}$ 0) surface | 0.23 j/m <sup>2</sup>              |

|           |                                      |                       |
|-----------|--------------------------------------|-----------------------|
| <b>3.</b> | Wurtzite/NNS (11 $\bar{2}$ 0)surface | 0.27 j/m <sup>2</sup> |
|-----------|--------------------------------------|-----------------------|

**Table S2.** Bader charge of both the surfaces of Rocksalt and Wurtzite polymorphs of MnSe.

| <b>S.No.</b> | <b>Polymorphs of MnSe</b> | <b>On bare Mn atom</b> | <b>Acetate adsorption</b> | <b>Methylamine adsorption</b> | <b>Ethylene group adsorption</b> |
|--------------|---------------------------|------------------------|---------------------------|-------------------------------|----------------------------------|
|--------------|---------------------------|------------------------|---------------------------|-------------------------------|----------------------------------|

|           |                                             |      |      |      |      |
|-----------|---------------------------------------------|------|------|------|------|
| <b>1.</b> | Rocksalt/NS (110 surface)                   | 1.13 | 1.21 | 1.17 | 1.12 |
| <b>2.</b> | Wurtzite/NNS ( $10\bar{1}0$ )/(100) surface | 1.12 | 1.22 | 1.15 | 1.10 |
